# Supplementary material for: Attention to Speech and Music in Young Children with Bilateral Cochlear Implants: A Pupillometry Study
Source: MDPI journal article supplement (doi:10.3390/jcm11061745), 2022-03-21

## S1. Initial model description

Using the function `buildmer` in the package `buildmer`, we have initially run the tested the fit of the model with the interaction of the main factors and the sound pressure level as an additional random intercept ( $\text{mean} \sim 1 + \text{group} + \text{noise} + \text{signal} + \text{group}*\text{noise}*\text{signal} + (1 | \text{subj}) + (1 | \text{sound})$ ) using `glm`, `gam`, or `(g)lmer` objects. The maximal feasible model was the following:  $\text{mean} \sim 1 + \text{group} + \text{noise} + \text{signal} + (1 | \text{subj})$ ; all higher models failed to converge. This model was then tested with the permutation linear mixed-effects model, so that we could easily obtain robust p-values. The advantage of these permutation p-values is that we could run multiple such models without requiring any Bonferroni correction.

ModelSummary:

Linear mixed model fit by REML ['lmerMod']

Formula:  $\text{mean} \sim 1 + \text{group} + \text{noise} + \text{signal} + (1 | \text{subj})$

REML criterion at convergence: -69.2

Scaled residuals:

| Min     | 1Q      | Median  | 3Q     | Max    |
|---------|---------|---------|--------|--------|
| -3.7447 | -0.6182 | -0.0111 | 0.6192 | 3.2935 |

Random effects:

|  | Groups   | Name        | Variance | Std.Dev. |
|--|----------|-------------|----------|----------|
|  | subj     | (Intercept) | 0.01525  | 0.1235   |
|  | Residual |             | 0.04298  | 0.2073   |

Number of obs: 478, groups: subj, 28

Fixed effects:

|                 | Estimate | Std.Error | t-value | Pr(> t ) |     |
|-----------------|----------|-----------|---------|----------|-----|
| (Intercept)     | 0.18829  | 0.04123   | 4.567   | <2e-16   | *** |
| groupNH.grou    | 0.11697  | 0.05162   | 2.266   | <2e-16   | *** |
| p               |          |           |         |          |     |
| noiselow.noise  | -0.01831 | 0.02318   | -0.790  | 0.203    |     |
| noisehigh.noise | 0.05057  | 0.02341   | 2.160   | 0.003    | **  |
| signalspeech    | 0.04326  | 0.02369   | 1.826   | 0.013    | *   |
| signalmusic     | 0.06362  | 0.02327   | 2.734   | <2e-16   | *** |

---

Signif. codes: 0 '\*\*\*' 0.001 '\*\*' 0.01 '\*' 0.05 '.' 0.1 ' ' 1

Correlation of Fixed Effects:

|             | (Intr) | grpNH  | nsllw.n | nshgh | sgnlsp |
|-------------|--------|--------|---------|-------|--------|
| groupNH.grp | -0.627 |        |         |       |        |
| noiselow.ns | -0.274 | 0.008  |         |       |        |
| noisehgh.ns | -0.279 | -0.006 | 0.490   |       |        |
| signalsp    | -0.285 | 0.000  | -0.026  | 0.012 |        |

|             |        |        |        |       |       |
|-------------|--------|--------|--------|-------|-------|
| signalmusic | -0.290 | -0.015 | -0.008 | 0.024 | 0.512 |
|-------------|--------|--------|--------|-------|-------|

Type III Analysis of Variance of the model with Satterthwaite's method

|        | npar | SumSq     |           | MeanSq   | F-value    | Pr(>F) |
|--------|------|-----------|-----------|----------|------------|--------|
| group  | 1    | 0.2348771 | 0.2348771 | 5.464434 | 0.01940734 |        |
| noise  | 2    | 0.3684189 | 0.1842095 | 4.285647 | 0.01376471 |        |
| signal | 2    | 0.3319152 | 0.1659576 | 3.861016 | 0.02104660 |        |

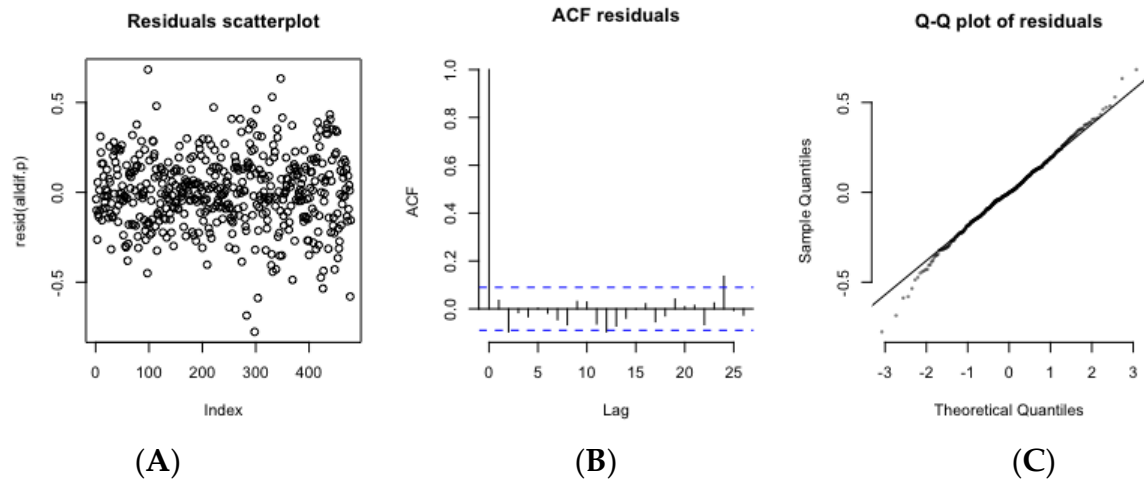

**Figure S1.** (A) Correlation plot of the residuals of the model initial model. (B) Autocorrelation plot of the residuals of m1. (C) Q-Q plot of the residuals of the initial model.

## S2. Permutation-based time-course analysis

The following permutation analyses were conducted separately for each group:

Analysis of the differences between various noise conditions during speech stimuli:

```
Speech.in.noise.CI.group <- clusterperm.lmer(pupil ~ noise + (1 | event),  
      data=subset(group == "CI.group" & signal == "speech"), series.var=~time)  
Speech.in.noise.NH.group <- clusterperm.lmer(pupil ~ noise + (1 | event),  
      data=subset(group == "NH.group" & signal == "speech"), series.var=~time)
```

Analysis of the differences between various noise conditions during music stimuli:

```
Music.in.noise.CI.group <- clusterperm.lmer(pupil ~ noise + (1 | event),  
      data=subset(group == "CI.group" & signal == "music"), series.var=~time)  
Music.in.noise.NH.group <- clusterperm.lmer(pupil ~ noise + (1 | event),  
      data=subset(group == "NH.group" & signal == "music"), series.var=~time)
```

Following Maris & Oostenveld (2007), the p-values corresponding to the cluster-mass test were computed for each time-sample. Although this could already comprise the entirety of the analysis, we used an approach more common fields that use time-course data, which is to use the time samples selected with the cluster-mass test as an input for our actual analysis. Thus, for each analysis, the time-window from the first till the last significant time-sample was selected as an input for our actual analysis, a linear mixed-effects model. We averaged our data along the selected window and then run a permutation linear mixed-effects model to obtain robust p-values.

### Speech.in.noise.CI.group:

Linear mixed model fit by REML ['lmerMod']

Formula: spin.ci.mean ~ 1 + noise + (1 | subj)

REML criterion at convergence: 0.4

Scaled residuals:

|  | Min      | 1Q       | Median  | 3Q      | Max     |
|--|----------|----------|---------|---------|---------|
|  | -2.72790 | -0.54685 | 0.00106 | 0.66116 | 2.13918 |

Random effects:

| Groups   | Name        | Variance | Std.Dev. |
|----------|-------------|----------|----------|
| subj     | (Intercept) | 0.01085  | 0.1042   |
| Residual |             | 0.04461  | 0.2112   |

Number of obs: 74, groups: subj, 14

Fixed effects:

|                | Estimate | Std.Error | t-value | Pr(> t ) |     |
|----------------|----------|-----------|---------|----------|-----|
| (Intercept)    | 0.38443  | 0.05189   | 7.409   | <2e-16   | *** |
| noiselow.noise | -0.07686 | 0.05958   | -1.290  | 0.070    | .   |

|                 |          |         |        |       |   |
|-----------------|----------|---------|--------|-------|---|
| noisehigh.noise | -0.08237 | 0.06242 | -1.320 | 0.062 | . |
|-----------------|----------|---------|--------|-------|---|

---

Signif. codes: 0 '\*\*\*' 0.001 '\*\*' 0.01 '\*' 0.05 '.' 0.1 ' ' 1

Correlation of Fixed Effects:

|             |        |        |
|-------------|--------|--------|
|             | (Intr) | nslw.n |
| noiselow.ns | -0.599 |        |
| noisehgh.ns | -0.562 | 0.487  |

Type III Analysis of Variance of the model with Satterthwaite's method

|       |       |           |            |          |           |
|-------|-------|-----------|------------|----------|-----------|
|       | npair | SumSq     | MeanSq     | F-value  | Pr(>F)    |
| noise | 2     | 0.1022162 | 0.05110812 | 1.145638 | 0.3180211 |

### Music.in.noise.CI.group:

Linear mixed model fit by REML ['lmerMod']

Formula: muin.ci.mean ~ 1 + noise + (1 | subj)

Data: data

REML criterion at convergence: 28.6

Scaled residuals:

|          |          |          |         |         |
|----------|----------|----------|---------|---------|
| Min      | 1Q       | Median   | 3Q      | Max     |
| -1.80396 | -0.62069 | -0.07954 | 0.65678 | 2.57829 |

Random effects:

|          |             |          |          |
|----------|-------------|----------|----------|
| Groups   | Name        | Variance | Std.Dev. |
| subj     | (Intercept) | 0.01973  | 0.1405   |
| Residual |             | 0.06417  | 0.2533   |

Number of obs: 78, groups: subj, 13

Fixed effects:

|                |          |           |         |          |     |
|----------------|----------|-----------|---------|----------|-----|
|                | Estimate | Std.Error | t-value | Pr(> t ) |     |
| (Intercept)    | 0.21356  | 0.06392   | 3.341   | <2e-16   | *** |
| noiselow.noise | 0.06361  | 0.06886   | 0.924   | 0.138    |     |
| noisehigh.nois | 0.03930  | 0.07332   | 0.536   | 0.366    |     |

e

---

Signif. codes: 0 '\*\*\*' 0.001 '\*\*' 0.01 '\*' 0.05 '.' 0.1 ' ' 1

Correlation of Fixed Effects:

|             |        |        |
|-------------|--------|--------|
|             | (Intr) | nslw.n |
| noiselow.ns | -0.566 |        |
| noisehgh.ns | -0.523 | 0.490  |

Type III Analysis of Variance of the model with Satterthwaite's method

|       | npars | SumSq      | MeanSq     | F-value   | Pr(>F)   |
|-------|-------|------------|------------|-----------|----------|
| noise | 2     | 0.05534035 | 0.02767017 | 0.4312122 | 0.649721 |

**Music.in.noise.NH.group:**

Linear mixed model fit by REML ['lmerMod']

Formula: muin.nh.mean ~ 1 + noise + (1 | subj)

REML criterion at convergence: 10.9

Scaled residuals:

|          | Min      | 1Q       | Median  | 3Q      | Max |
|----------|----------|----------|---------|---------|-----|
| -2.50937 | -0.51500 | -0.07614 | 0.61248 | 2.56408 |     |

Random effects:

|  | Groups   | Name        | Variance | Std.Dev. |
|--|----------|-------------|----------|----------|
|  | subj     | (Intercept) | 0.01278  | 0.1130   |
|  | Residual |             | 0.05158  | 0.2271   |

Number of obs: 91, groups: subj, 14

Fixed effects:

|                 | Estimate | Std.Error | t-value | Pr(> t ) |     |
|-----------------|----------|-----------|---------|----------|-----|
| (Intercept)     | 0.30312  | 0.05036   | 6.020   | <2e-16   | *** |
| noiselow.noise  | 0.05736  | 0.05843   | 0.982   | 0.154    |     |
| noisehigh.noise | 0.24514  | 0.05810   | 4.219   | <2e-16   | *** |

---

Signif. codes: 0 '\*\*\*' 0.001 '\*\*' 0.01 '\*' 0.05 '.' 0.1 ' ' 1

Correlation of Fixed Effects:

|              | (Intr) | nslnw.n |
|--------------|--------|---------|
| noiselow.ns  | -0.528 |         |
| noisehigh.ns | -0.529 | 0.463   |

Type III Analysis of Variance of the model with Satterthwaite's method

|       | npars | SumSq     | MeanSq    | F-value  | Pr(>F)       |
|-------|-------|-----------|-----------|----------|--------------|
| noise | 2     | 0.9803567 | 0.4901784 | 9.504038 | 7.455015e-05 |

**Figure S2A.** Time windows defined by the cluster mass statistic for the permutation-based analysis of speech in noise in the CI group.

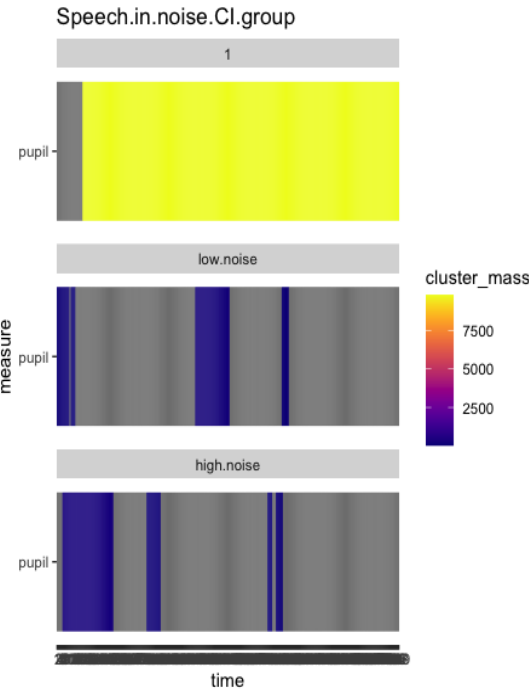

**Figure S2B.** Time windows defined by the cluster mass statistic for the permutation-based analysis of speech in noise in the NH group.

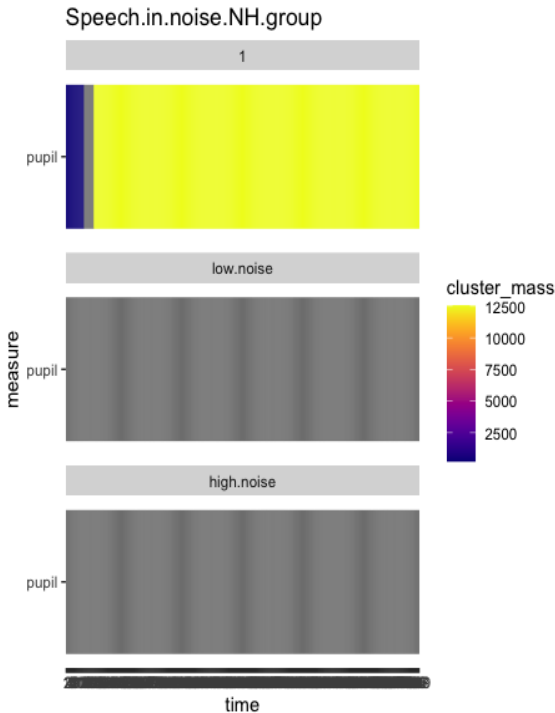

**Figure S2C.** Time windows defined by the cluster mass statistic for the permutation-based analysis of music in noise in the CI group.

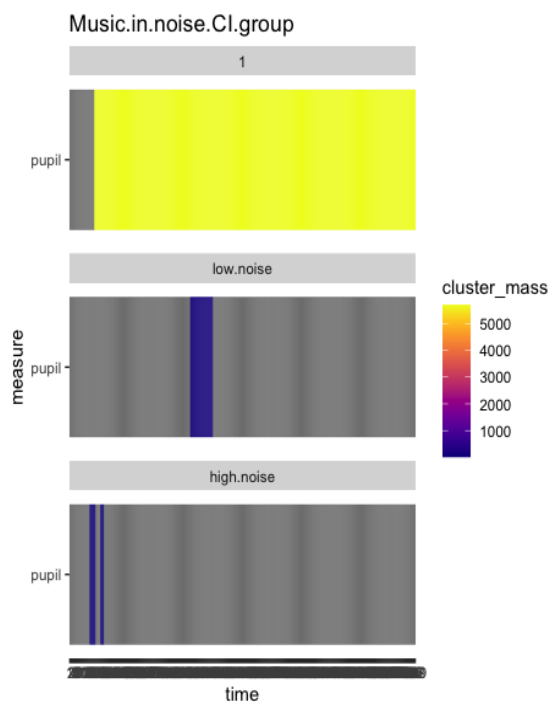

**Figure S2D.** Time windows defined by the cluster mass statistic for the permutation-based analysis of music in noise in the NH group.

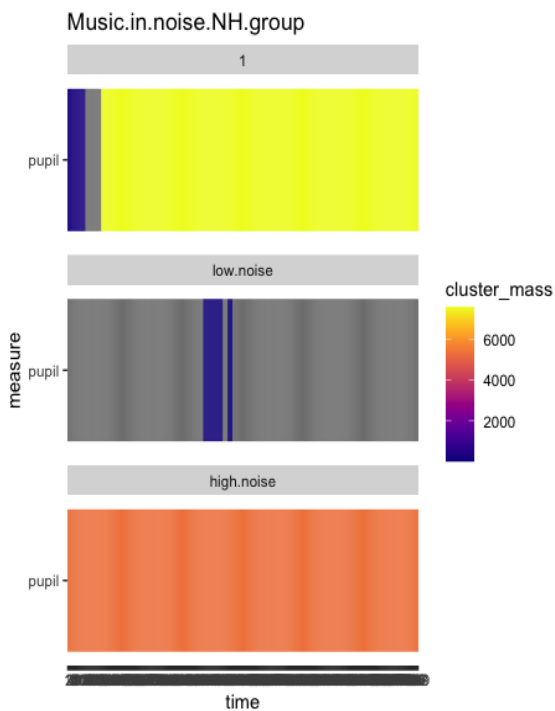

Supplement: s1 [file s1]
